# Supplementary material for: The ALOMAR Rayleigh/Mie/Raman lidar: status after 30 years of operation
Source: Copernicus journal article supplement (doi:10.5194/amt-2024-31), 2024-04-29
Supplement: Supplementary file [file amt-2024-31-AC2-supplement.pdf]

We would like to thank the reviewer for the very positive assessment of the ALOMAR RMR lidar and the manuscript.

This is an excellent paper. The ALOMAR lidar is one of the legends in the middle and upper atmosphere field. The authors present comprehensive descriptions of the development of the lidar system. It will be helpful to the community to understand the details of the system's hardware. The paper is well organized, and the selected measurement results are interesting and demonstrate the system's capability. Looking forward to more scientific finds come out from this system.
