# Supplementary material for: The ALOMAR Rayleigh/Mie/Raman lidar: status after 30 years of operation
Source: Copernicus journal article supplement (doi:10.5194/amt-2024-31), 2024-04-29
Supplement: Supplementary file [file amt-2024-31-AC3-supplement.pdf]

We thank Robert Sica for his very positive assessment of the ALOMAR RMR lidar and the manuscript. We appreciate his annotations in the quick report as it helped us improving the manuscript. In the following we address the comments (in blue color). Page and figure numbers refer to the original submission.

This manuscript is an excellent and thorough overview of the ALOMAR RMR developed by the authors and their team. It includes the technical details which support the numerous scientific studies cited and will be very useful to the community for understanding the details behind past and future scientific papers using measurements from the system.

Page1: We exchanged the reference for the historic cloud height measurement using a high-voltage spark with the original reference (Jones, 1949).

Page2: Station altitude is added.

Page 6: The laser cavity control by pulse build-up time reduction is referenced: Rahn, 1985.

Figure 5: The lower right panel additionally shows the number of different days with measurements per year.

Page 17: Reference to Junge, 1961

Most comments on text improvements have been taken into account, see manuscript version with changes marked.
